# Supplementary material for: Scaling the interactive effects of attractive and repellent odours for insect search behaviour
Source: PubMed Central journal article supplement (PMC6814803; doi:10.1038/s41598-019-51834-1), 2019-10-25
Supplement: 41598_2019_51834_MOESM1_ESM.pdf [file 41598_2019_51834_MOESM1_ESM.pdf]

# Scaling the interactive effects of attractive and repellent odours for insect search behaviour

Scientific Reports

## Supplementary information

### Author affiliation:

**Thomas A. Verschut<sup>[1-2]</sup>, Mikael A. Carlsson<sup>[2]</sup> and Peter A. Hambäck<sup>[1]</sup>**

1. Department of Ecology, Environment and Plant Sciences, Stockholm University, 106 91 Stockholm, Sweden.

2. Department of Zoology, Stockholm University, 106 91 Stockholm, Sweden.

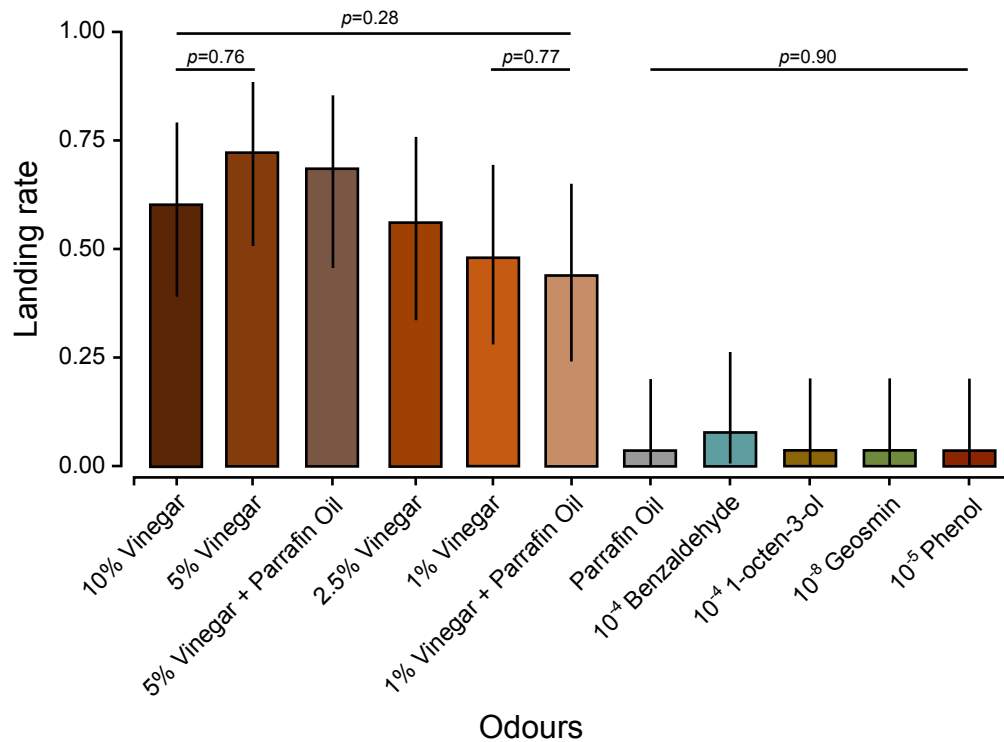

**Fig. S1.** The landing rates ( $\pm 95\%$  confidence intervals) of *Drosophila melanogaster* on vinegar and benzaldehyde, 1-octen-3-ol, geosmin and phenol. The landing rates on 1% and 5% vinegar were, respectively, used throughout the study as the low and high vinegar concentration. No effect in combination with 500  $\mu$ l Paraffin oil (solvent for the repellents) was found for either 1% (GLM:  $\chi^2_{1,48}=0.09$ ,  $P=0.77$ ) or 5% vinegar (GLM:  $\chi^2_{1,48}=0.08$ ,  $P=0.76$ ). The second highest concentration of each repellents was tested by itself as a control treatment.

**Table S1.** Summary of the likelihood ratio tests ( $\chi^2$ ) of the landing rates of *Drosophila melanogaster* on combinations of a low (1%) or high (5%) vinegar concentration with a repellent in the wind tunnel. For the repellents the concentrations used in the experiment are given between brackets. The predicted parameter value is given as the mean  $\pm$  standard error (i.e. estimate).

| Repellent                                 | Factor    | GLM<br>(df 1,247) |          |                  | GAM<br>(df 1,246) |          |                  | GLM vs. GAM<br>( $\Delta df=1$ ) |              |
|-------------------------------------------|-----------|-------------------|----------|------------------|-------------------|----------|------------------|----------------------------------|--------------|
|                                           |           | Estimate $\pm$ SE | $\chi^2$ | P                | Estimate $\pm$ SE | $\chi^2$ | P                | Deviance                         | P            |
| Benzaldehyde<br>( $10^{-5}$ - $10^{-1}$ ) | Vinegar   | 0.46 $\pm$ 0.18   | 6.58     | <b>0.010</b>     | 0.46 $\pm$ 0.18   | 6.43     | <b>0.011</b>     | 1.17                             | 0.279        |
|                                           | Repellent | -0.22 $\pm$ 0.05  | 26.09    | <b>&lt;0.001</b> | 0.17 $\pm$ 0.03   | 29.72    | <b>&lt;0.001</b> | -                                | -            |
| 1-Octen-3-ol<br>( $10^{-5}$ - $10^{-1}$ ) | Vinegar   | 0.37 $\pm$ 0.19   | 3.81     | 0.051            | 0.37 $\pm$ 0.19   | 3.73     | 0.053            | 0.09                             | 0.762        |
|                                           | Repellent | -0.20 $\pm$ 0.05  | 18.29    | <b>&lt;0.001</b> | -0.21 $\pm$ 0.03  | 38.47    | <b>&lt;0.001</b> | -                                | -            |
| Geosmin<br>( $10^{-9}$ - $10^{-5}$ )      | Vinegar   | 0.36 $\pm$ 0.19   | 3.79     | 0.051            | 0.36 $\pm$ 0.18   | 3.73     | 0.054            | 1.923                            | 0.166        |
|                                           | Repellent | -0.24 $\pm$ 0.05  | 26.49    | <b>&lt;0.001</b> | 0.09 $\pm$ 0.02   | 36.27    | <b>&lt;0.001</b> | -                                | -            |
| Phenol<br>( $10^{-6}$ - $10^{-2}$ )       | Vinegar   | 0.61 $\pm$ 0.19   | 11.09    | <b>&lt;0.001</b> | 0.61 $\pm$ 0.19   | 10.81    | <b>0.001</b>     | 7.61                             | <b>0.005</b> |
|                                           | Repellent | -0.27 $\pm$ 0.05  | 34.32    | <b>&lt;0.001</b> | 0.16 $\pm$ 0.03   | 35.13    | <b>&lt;0.001</b> | -                                | -            |
